1 **Combinatorial interpretation of BMP and WNT allows BMP to act as a**  
2 **morphogen in time but not in concentration.**

3

4 Elena Camacho-Aguilar<sup>1</sup>, Sumin Yoon<sup>1</sup>, Miguel A. Ortiz-Salazar<sup>1</sup>, Aryeh Warmflash<sup>1,2\*</sup>

5

6 <sup>1</sup>Department of Biosciences and <sup>2</sup>Department of Bioengineering, Rice University,  
7 Houston TX 77005

8 \*author for correspondence: [aryeh.warmflash@rice.edu](mailto:aryeh.warmflash@rice.edu)

9

10

11 **Abstract**

12 Secreted morphogen signals play a key role in the determination of cell fates during  
13 embryonic development. BMP signaling is essential for vertebrate gastrulation, as it  
14 initiates a cascade of signals that controls the self-organized patterning of the three germ  
15 layers. Although morphogen signals are typically thought to induce cell fates in a  
16 concentration-dependent manner, development is a highly dynamic process, so it is  
17 crucial to understand how time-dependent signaling affects cellular differentiation. Here  
18 we show that varying the duration of BMP signaling leads to either pluripotent,  
19 mesodermal, and extraembryonic states, while varying the concentration does not cause  
20 efficient mesodermal differentiation at any dose. Thus, there is a morphogen effect in time  
21 but not in concentration, and an appropriately timed pulse of BMP induces hPSCs to a  
22 mesodermal fate more efficiently than sustained signaling at any concentration. Using live  
23 cell imaging of signaling and cell fate reporters together with a simple mathematical  
24 model, we show that this effect is due to a combinatorial interpretation of the applied BMP  
25 signal and induced endogenous WNT signaling. Our findings have implications for how  
26 signaling pathways control the landscape of early human development.

27

## 28 Introduction

29 In mammalian development, gastrulation is the first differentiation event of the embryo  
30 proper (Arnold and Robertson, 2009; Bardot and Hadjantonakis, 2020) where the  
31 pluripotent epiblast differentiates into the three germ layers of the embryo: ectoderm,  
32 mesoderm, and endoderm. This process is orchestrated by a cascade of signals initiated  
33 by BMP signaling from the extraembryonic tissues which triggers Wnt and Nodal signaling  
34 in the epiblast (Ben-Haim et al., 2006; Brennan et al., 2001; Tortelote et al., 2013). The  
35 ligands for all three pathways find their highest expression in the proximal posterior  
36 portion of the embryo, where the primitive streak emerges, defining the anterior-posterior  
37 axis of the embryo (Conlon et al., 1994; Liu et al., 1999; Winnier et al., 1995). However,  
38 how cell differentiation is combinatorially controlled by this cascade of signals at this stage  
39 is still not completely understood.

40  
41 Technical and ethical issues prevent the study of these questions *in vivo*, especially in  
42 the human embryo. To overcome this problem, several *in vitro* models of mammalian  
43 gastrulation have been developed that can serve as proxies for investigating these stages  
44 of development (Camacho-Aguilar and Warmflash, 2020; Fu et al., 2021; Heemskerk,  
45 2020; Shahbazi et al., 2019). In particular, we and others have shown that human  
46 pluripotent stem cells (hPSCs) grown in colonies of precise size and shape using  
47 micropatterning technology and treated with the upstream gastrulation-inducing signal  
48 BMP4 pattern into all three germ layers plus a fourth one transcriptionally similar to  
49 extraembryonic tissues which most likely represents the amnion (Chhabra and  
50 Warmflash, 2021; Chhabra et al., 2019; Etoc et al., 2016; Minn et al., 2020; Warmflash et  
51 al., 2014). While some studies have suggested that these fates may emerge from  
52 differential concentrations of BMP generated by diffusion and interactions with the  
53 inhibitor Noggin (Tewary et al., 2017), several studies contradict this idea.

54  
55 First, in colonies of sizes of 10 cells or smaller, BMP acts as a switch controlling a cell  
56 state transition from pluripotency to extraembryonic as BMP concentration increases  
57 without inducing mesendodermal fates at any dose (Nemashkalo et al., 2017). In fact,  
58 primitive streak induction only takes place when the cell density is above a threshold, and  
59 it is blocked if either the Wnt or Nodal pathways are inhibited (Chhabra et al., 2019;  
60 Nemashkalo et al., 2017). Thus, secondary signals are necessary for BMP to induce  
61 differentiation into the three germ layers. However, much remains unknown about the  
62 underlying mechanisms.

63  
64 Here we studied how cell fate decisions are controlled by BMP signaling during human  
65 pluripotent stem cell differentiation *in vitro*. We investigated how hPSCs interpret duration  
66 and concentration of the applied BMP4 signal. Our results unveiled a *morphogen effect*  
67 in time, where short, intermediate, and long pulses of BMP4 signaling result in cells  
68 adopting pluripotent, mesodermal, and extraembryonic states, respectively. In contrast,  
69 there was no comparable morphogen effect in concentration: varying the BMP  
70 concentration does not cause comparably efficient mesodermal differentiation at any  
71 dose. Using live cell imaging of signaling reporters we discovered that the temporal

72 morphogen effect is controlled by combinatorial interpretation of the exogenously  
73 supplied BMP4 and the endogenously induced WNT signaling. Taking advantage of  
74 mathematical modelling, we uncovered the minimal requirements for the logic that  
75 controls these cell fate decisions, providing a fate map that explains the mechanism that  
76 allows BMP to act as a morphogen in time but not in concentration. Our findings have  
77 implications for how signaling pathways control the landscape of early human  
78 development and highlight the importance of time in *in vitro* differentiation protocols.

79

## 80 **Results**

81

### 82 **BMP signaling produces a morphogen effect in time but not in concentration**

83 As BMP induces extraembryonic fates directly but other fates through intermediates (Ben-  
84 Haim et al., 2006; Martyn et al., 2018; Nemashkalo et al., 2017), we speculated that the  
85 timescales for these processes may differ, and the duration of BMP treatment may be an  
86 important variable. Previous differentiation protocols in hPSCs also indicated that the  
87 timing of BMP treatment may influence the outcome (Zhang et al., 2008). We cultured  
88 hPSCs for two days, exposing them to varying durations of BMP4 treatment of a fixed  
89 concentration, 10 ng/mL, at the outset (Fig. 1A). We observed that cells that were  
90 exposed to a BMP pulse of 8 hours or less returned to the pluripotent or undifferentiated  
91 state, as marked by high SOX2, OCT4, and NANOG expression (Fig. 1B-D, S1A,B). On  
92 the other hand, BMP pulses longer than 32 hours were necessary to differentiate cells  
93 uniformly into an extraembryonic state, marked by high CDX2, ISL1, HAND1 and GATA3  
94 expression (Fig. 1B-D, S1C-F). Strikingly, pulses of 16 hours showed a high level of  
95 mesoderm or primitive streak differentiation, marked by high BRA expression (Fig. 1B-  
96 D). These results unveiled a *morphogen effect* in the duration of BMP signaling, with  
97 short, intermediate, and long pulses resulting in pluripotent, mesodermal, and  
98 extraembryonic fates, respectively.

99

100 Several studies have suggested that for other pathways, including Sonic Hedgehog,  
101 duration and amplitude of signaling may be interchangeable, with shorter treatment with  
102 higher doses being equivalent to longer exposure to low doses (Dessaud et al., 2007;  
103 Sagner and Briscoe, 2017). If this was the case for BMP signaling in hPSCs, the high  
104 proportion of mesodermal cells obtained with a pulse of intermediate duration should be  
105 reproduced by treating hPSCs with a constant 2-day pulse of a lower BMP concentration.  
106 To test this, we compared the results of treating cells with 10 ng/mL BMP4 pulses of  
107 intermediate durations (ranging from 14 to 24 hours) (Fig. 2A,B), to the results obtained  
108 by inducing hPSCs with several constant concentrations (ranging from 1 to 4 ng/ml) for  
109 48 hours (Fig. 2C,D). We observed that constant induction by any lower BMP4  
110 concentration could not reproduce the high percentage of mesoderm cells obtained with  
111 10ng/mL BMP4 for intermediate durations (Fig. 2A-D).

112

113 To further investigate the interplay between concentration and time of exposure to control  
114 hPSCs fate specification, we induced hPSCs with different pulses (increasing from 0 to  
115 48 hours in 6 hours increments) of varying concentrations of BMP4 (ranging from 2 to 50

116 ng/mL) and observed the cell fates after 48 hours (Fig. S2A,B). Interestingly, when BMP4  
 117 containing media was withdrawn and replaced by fresh media, the data suggested that  
 118 for higher concentrations, shorter pulses were needed to induce mesoderm fates. While  
 119

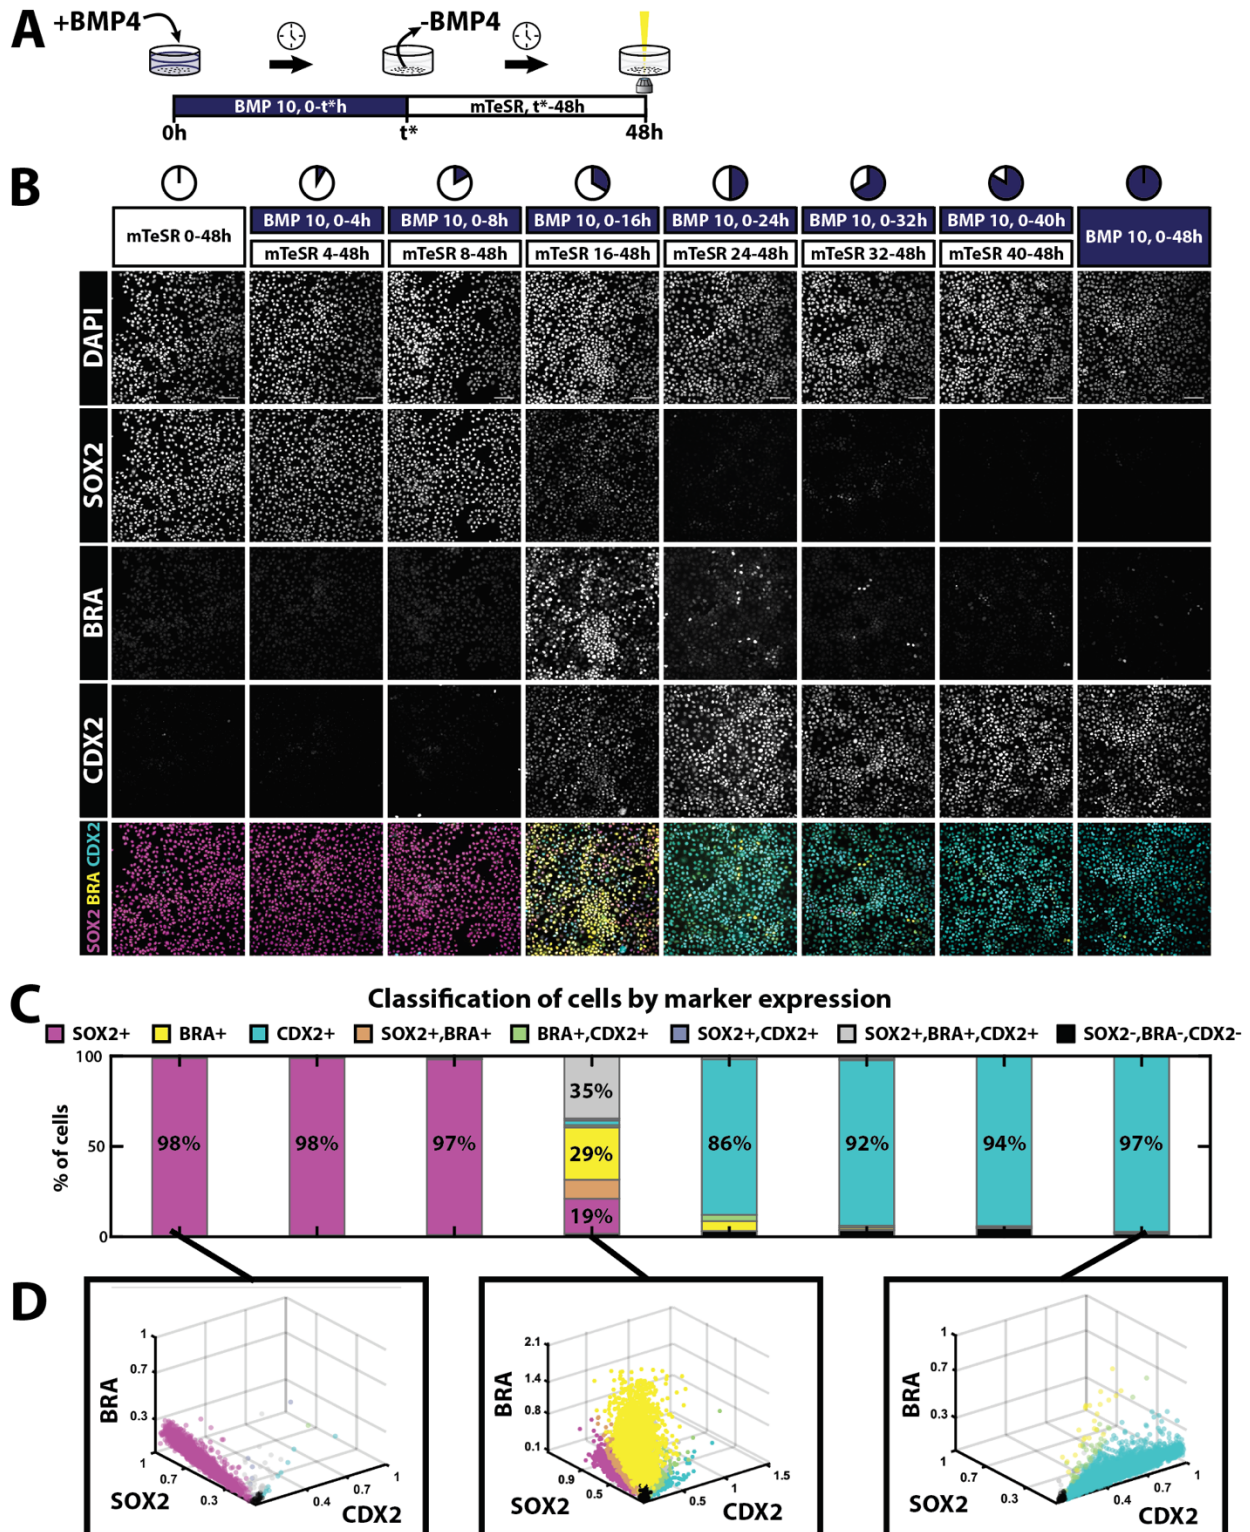



**Figure 1. BMP4 signaling produces a morphogen effect in time.** (A) Schematic of the induction protocol. hPSCs are treated with a pulse of 10ng/mL BMP4 of varying durations ( $t^*$ ) after which the BMP-containing media is removed and replaced by the pluripotency maintenance media mTeSR1. hPSCs are always fixed and immunostained 48h after the onset of induction. (B) Example images of immunofluorescence for DAPI, SOX2, BRA, and CDX2 after the indicated BMP4 treatments. (C) Quantifications of cell fate proportions for the experimental conditions in (B). (D) From left to right, scatter plots of the quantifications of SOX2, BRA and CDX2 for the conditions mTeSR 0-48h, BMP 10ng/mL 0-16h followed by mTeSR 16-48h, and BMP 10ng/mL 0-48h, respectively. Each dot corresponds to a single cell, and its color marks the cell fate assigned to the cell as shown in (C). Scale bars: 100um.

120 this result might suggest a tradeoff between time and concentration, an alternative  
121 possibility is that it could be due to a partial removal of the BMP4 ligand, with higher doses  
122 being more difficult to completely remove compared to lower ones. To distinguish these  
123 possibilities, we compared removing BMP ligand with or without adding the BMP inhibitor  
124 Noggin to extinguish any remaining signal. Consistent with the idea that added BMP  
125 cannot be removed by washing alone, even 3 mTeSR washes were insufficient to lower  
126 the levels of differentiation to those observed by adding Noggin (Fig. S2C).

127  
128 We therefore repeated the above experiment using a variety of different BMP durations  
129 and concentrations with a modified protocol in which BMP containing media was replaced  
130 by Noggin containing media. Mesoderm induction peaked with a BMP4 pulse of around  
131 30h for nearly all concentrations except for the lowest ones (Fig. 2E,F). The later peak at  
132 lower concentrations is due to a slower induction of secondary signals necessary for  
133 differentiation, as we show below (see Fig. S3E). Notably, even though the most efficient  
134 duration of the BMP4 pulse was common for all concentrations above 3 ng/ml,  
135 quantification showed that higher concentrations yielded higher proportions of BRA  
136 positive cells. Taken together, the results suggest that concentration and time of exposure  
137 are not interchangeable, and that efficient mesoderm induction after 48 hours of treatment  
138 required a pulse of a high BMP4 concentration.

### 139 140 **BMP signal induces WNT in a bistable fashion**

141 In order to understand how signaling dynamics underlie our results on cell fate induction,  
142 we took advantage of live cell reporters of signaling activity to measure the signaling  
143 response in time under different treatment conditions. In particular, we first tracked the  
144 BMP4 response by performing live imaging of hPSCs with a GFP::SMAD4 fusion in the  
145 endogenous locus (Nemashkalo et al., 2017), and quantified the strength of the signaling  
146 response as the ratio of nuclear and cytoplasmic SMAD4 intensity (Fig. 3A-D, S3A,D).  
147 Consistent with our previous work (Heemskerk et al., 2019; Nemashkalo et al., 2017), a  
148 sudden increase in BMP4 leads to a rapid translocation of SMAD4 into the nucleus in less  
149 than 30 minutes. This response is sustained with a gradual decrease in activity over time  
150 for the remaining 48 hours if BMP4 was kept in the media (Fig. 3D, S3A). Addition of  
151 Noggin resulted in a rapid decrease in nuclear SMAD4 to baseline (Fig. 3D, S3A).  
152 Consistent with our previous observations, removal of BMP4 without Noggin addition

153 resulted in a rapid decrease in nuclear SMAD4 but to a higher level than baseline,  
 154 indicating that some BMP4 remains in the media (Fig. 3D, S3A,D).

155

156 We then explored WNT/ $\beta$ -catenin response, the next member of the signaling cascade  
 157 that plays a role in gastrulation and mesoderm (Arnold and Robertson, 2009). We tracked  
 158 WNT response by performing live imaging of hPSCs with GFP fused to the N terminus of  
 159 endogenous  $\beta$ -catenin (Massey et al., 2019), and quantified the strength of the signaling  
 160 response as the mean nuclear  $\beta$ -catenin intensity (Fig. 3E-H). Strikingly, measurement of

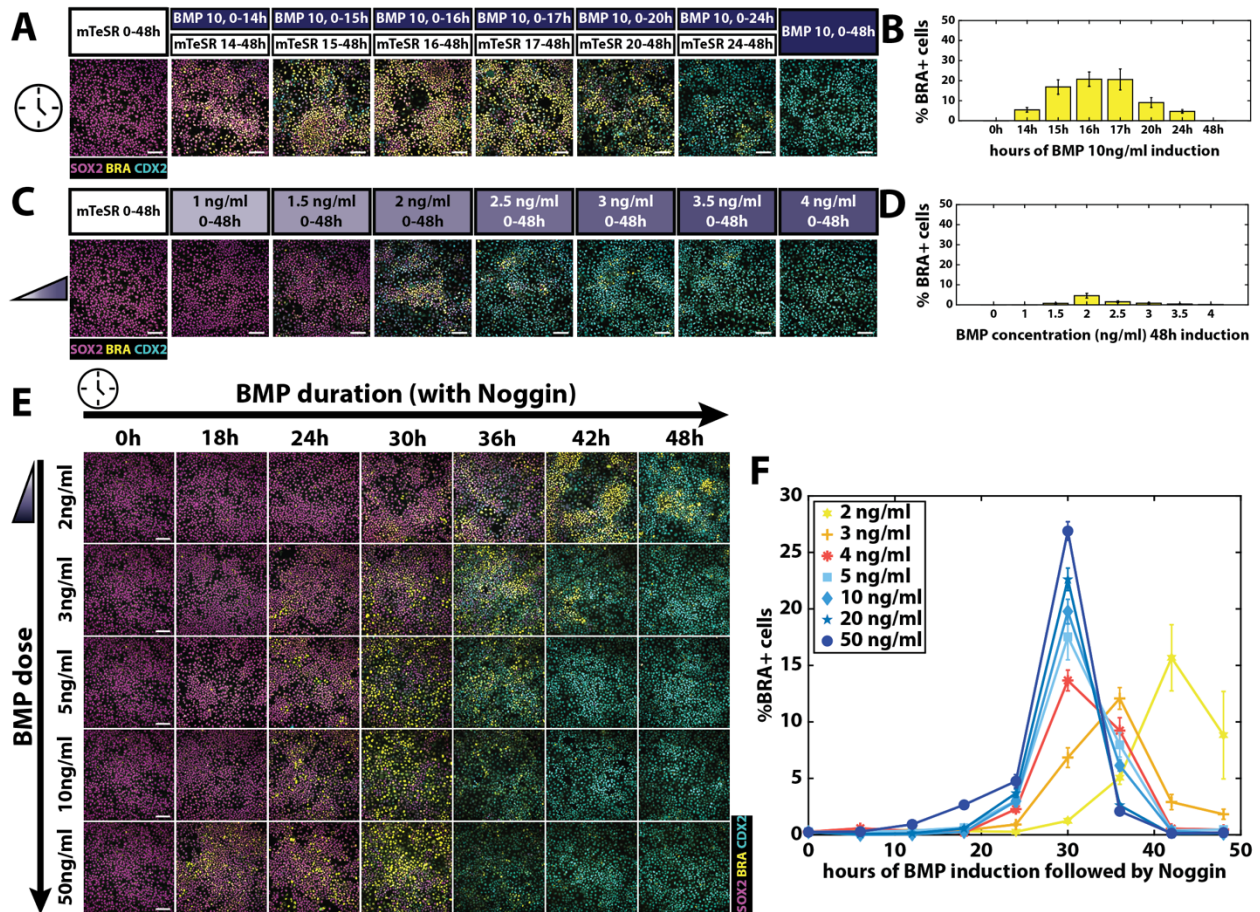

**Figure 2. Duration and concentration of BMP4 signaling are not interchangeable. (A)** Example images of immunofluorescence for SOX2, BRA, and CDX2 in magenta, yellow, and cyan, respectively, after the indicated pulses of 10ng/ml BMP4 treatments followed by mTeSR. **(B)** Quantifications of the proportions of cells classified as BRA+ in the treatments shown in (A). **(C)** Example images of immunofluorescence for SOX2, BRA, and CDX2 in magenta, yellow, and cyan, respectively, after the treatments of the indicated constant concentrations of BMP4. **(D)** Quantifications of the proportions of cells classified as BRA+ in the treatments shown in (C). **(E)** Example images of immunofluorescence for SOX2, BRA, and CDX2 in magenta, yellow, and cyan, respectively, after the 48h treatments with pulses of the indicated times (columns) followed by Noggin, of the indicated concentrations (rows) of BMP. **(F)** Quantifications of the proportions of cells classified as BRA+ in the treatments shown in (E). Scale bars: 100um. Error bars in (B), (D), and (F) show the SEM.

161 Wnt dynamics revealed a bistable WNT/ $\beta$ -catenin response (Fig. 3H, S3B-C). If BMP was  
 162 withdrawn early,  $\beta$ -catenin levels converged to a low level in time. However, if BMP was  
 163 presented for sufficiently long, WNT activity became self-sustaining and remained stable  
 164 even after BMP withdrawal. This likely results from positive feedback in which WNT

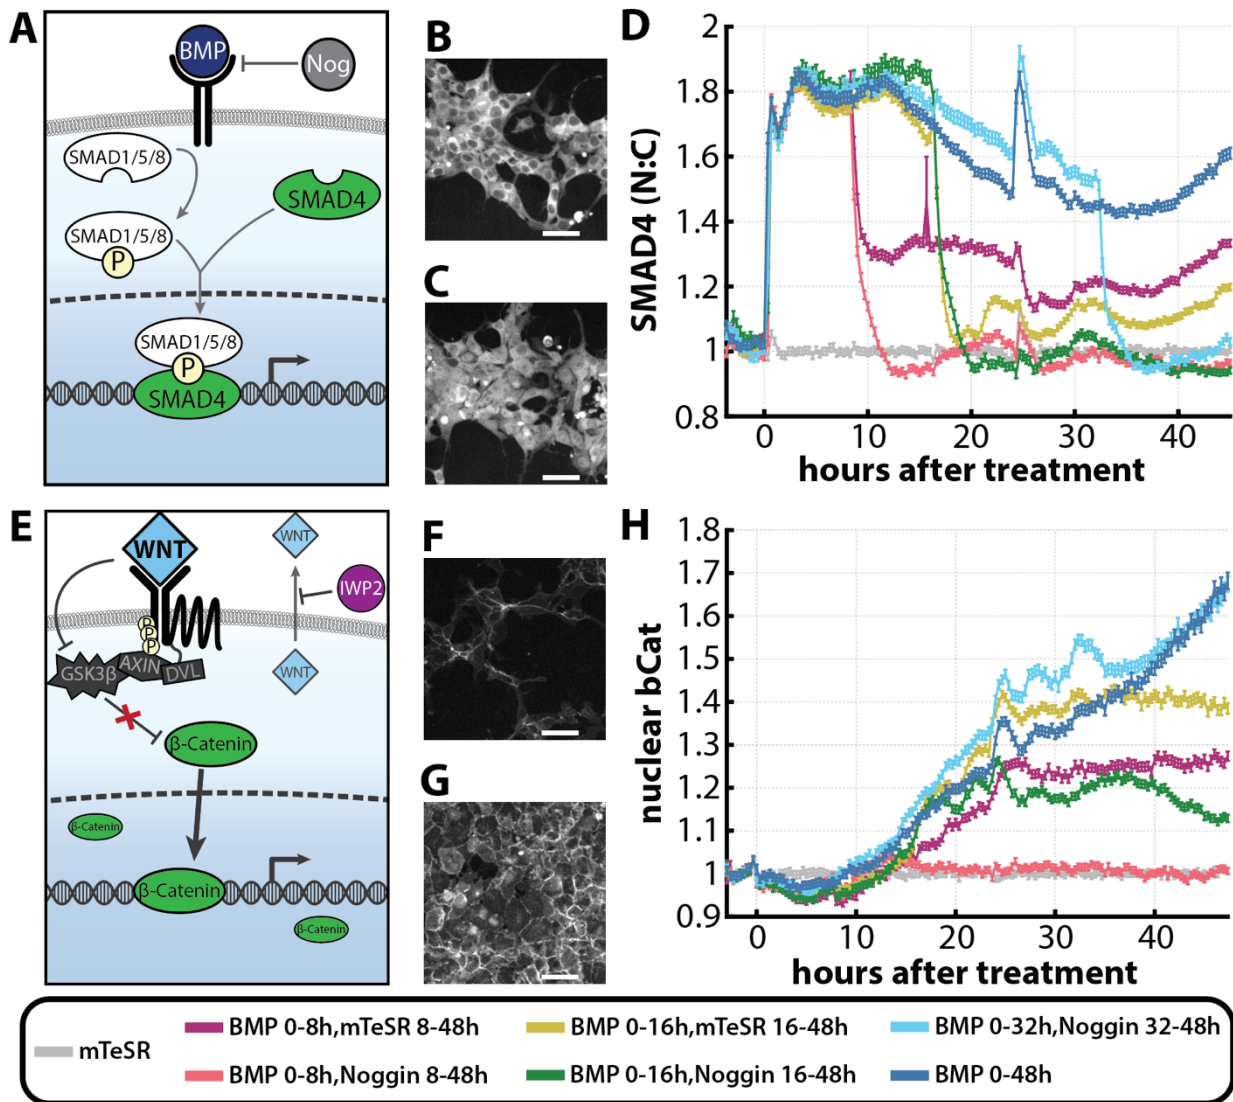

**Figure 3. BMP signaling induces a bistable endogenous WNT.** (A) BMP signal is transduced through SMAD4 translocation to the nucleus. Noggin inhibits BMP signal by preventing it from binding to the receptors. (B,C) hPSCs expressing GFP::SMAD4 before BMP4 treatment (B), and 5 hours after treatment with BMP4 (C). (D) GFP::SMAD4 average nuclear:cytoplasmic intensity ratio after the treatments indicated at the bottom of the figure. Additional experimental conditions are shown in Fig. S3A. (E) Simplified canonical WNT/ $\beta$ -catenin pathway. IWP2 prevents canonical WNT secretion. (F,G) hPSCs expressing GFP:: $\beta$ -catenin before BMP treatment (F), and 40 hours after treatment with BMP4 (G). (H) GFP:: $\beta$ -catenin average nuclear intensity after the treatments indicated at the bottom of the figure. Additional experimental conditions are shown in Fig. S3B-C. Scale bars: 50 $\mu$ m.



165 signaling activates its own ligands, as has been shown in other contexts (Wang et al.,  
166 2012).

167

168 Comparing the signaling trajectories with the resulting fates reveals that only in cases  
169 where BMP is repressed after having induced WNT to a high level are cells able to  
170 differentiate to mesoderm (Fig. S3B,C). This suggests that a combinatorial effect between  
171 BMP and BMP-induced, bistable Wnt signals underlies the observed morphogen effect in  
172 time. Short BMP durations of high BMP concentration are not enough to activate WNT  
173 and therefore cells remain pluripotent. On the other hand, if BMP is maintained for longer  
174 than 32 hours, Wnt signaling is induced but is insufficient to override the effects of BMP  
175 signaling, and cells become extraembryonic. It is in a window of middle durations, where  
176 BMP is maintained for long enough to induce Wnt autoactivation but is then suppressed,  
177 that cells are exposed to a low BMP, high Wnt signaling profile, and mesoderm  
178 differentiation is obtained.

179

180 We also investigated how WNT/ $\beta$ -catenin response depended on cell density, as previous  
181 studies have shown that cell density is critical for BMP signal to induce mesodermal fates  
182 (Nemashkalo et al., 2017). Consistent with these studies, we observed that if we reduced  
183 the number of cells seeded from 40K cells/cm<sup>2</sup> to 15K cells/cm<sup>2</sup>, pulses of BMP of high  
184 concentration could no longer induce mesoderm (Fig. S4A-D). To understand whether  
185 the lack of mesoderm correlated with reduced WNT signaling, we compared the WNT  
186 response of cells seeded in a density of 40K cells/cm<sup>2</sup> (high density) versus cells seeded  
187 in a density of 15K cells/cm<sup>2</sup> (low density) by performing live imaging of the  $\beta$ -catenin  
188 reporter cells (Fig. S4E). Indeed, we observed that the WNT response under BMP  
189 treatment was lower at low densities. While BMP induced a high WNT response in cells  
190 seeded at high density, the WNT response of cells seeded at low density under the same  
191 BMP treatment was comparable to non-treated cells at high density (Fig. S4E). Moreover,  
192 treating cells with IWP2 at the time of BMP treatment to inhibit the secretion of  
193 endogenous Wnt ligands suppressed mesoderm induction (Fig. S5). Finally, we  
194 investigated how the WNT response depended on BMP concentration, and observed that  
195 the rate of increase of nuclear  $\beta$ -catenin increased as the BMP dose increased (Fig. S3E).  
196 Taken together, these results suggest that BMP induces a bistable endogenous WNT  
197 signal in a concentration dependent manner, that is necessary for mesoderm induction.  
198 The mechanism behind this process will be discussed further below.

199

### 200 **A simple mathematical model reproduces the observed WNT bistability**

201 To better understand the observed WNT bistability, we developed a minimal  
202 mathematical model that recapitulated the signaling dynamics described above. This  
203 model is comprised of two sub-systems of differential equations that model the BMP and  
204 Wnt responses, respectively, and which are connected via BMP4 activation of Wnt, which  
205 reflects the transcriptional activation of *WNT3* by BMP signaling (Fig. 4A-B) (Kurek et al.,  
206 2015).

207



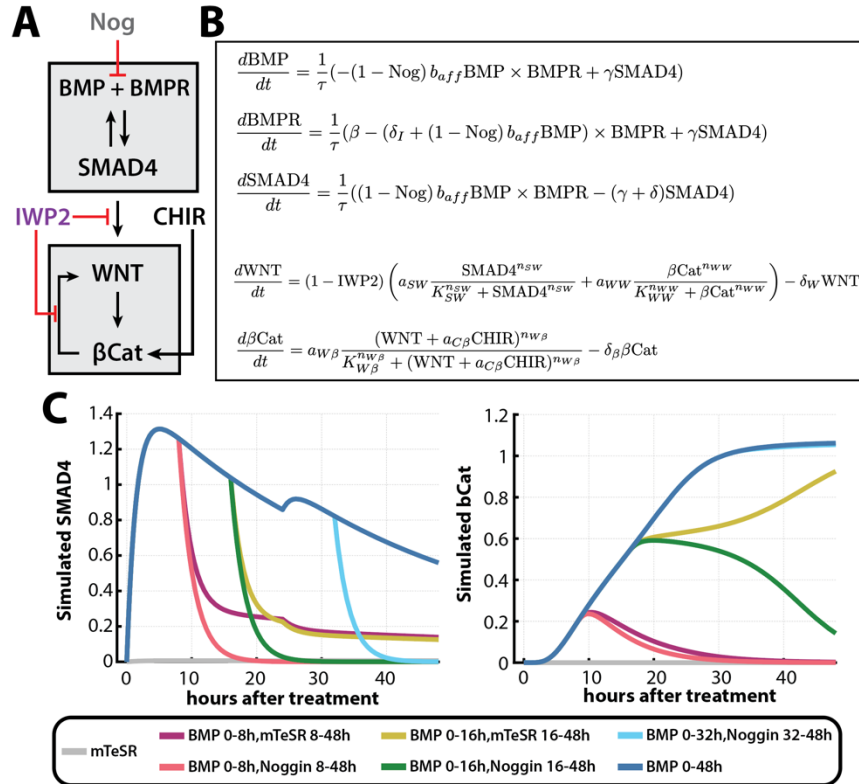

**Figure 4. BMP-induced WNT bistability is reproduced by a simple mathematical model.**

**(A)** Schematic of the network regulating BMP and WNT response. **(B)** System of ODEs that model the network dynamics in (A).

**(C)** Simulations of BMP and WNT dynamics under the indicated BMP4 treatments. Media change is also simulated at 24 hours for all conditions. BMP = BMP4 ligand. BMPR = BMP4 receptors. SMAD4 = Nuclear SMAD4. Nog = Noggin. WNT = WNT ligands. βCat = Nuclear β-catenin. IWP2 = IWP2.

208 We simulated the BMP response using the model proposed  
 209 in (Heemskerk et al., 2019), where binding of BMP ligands to  
 210 the receptor complex activates SMAD4 but enhances the  
 211 degradation of the BMP receptor (Fig. 4A-B). The effect of the BMP inhibitor Noggin is  
 212 modelled by a direct inhibition of BMP binding to free receptors (Fig. 4A-B). BMP  
 213 withdrawal without Noggin addition was modelled by multiplying the original BMP  
 214 concentration by a constant that represented the percentage of BMP that remained in the  
 215 culture, as observed in Fig. 3 and S3. With this model, features of SMAD4 dynamics  
 216 observed in the data such as fast SMAD4 upregulation upon BMP4 treatment, rapid  
 217 SMAD4 downregulation by Noggin, and slow decay were reproduced (Fig. 4C, S6A,B).

218

219 The second sub-system models the Wnt response. Wnt expression is activated by  
 220 SMAD4 and activates nuclear β-catenin. β-catenin in turn further activates Wnt signaling.  
 221 The need to accumulate sufficient Wnt protein before β-catenin becomes active explains  
 222 the delay in the rise in β-catenin activity observed experimentally (see Fig. 3H). Details of  
 223 this model can be found in the Supplemental Material.

224

225 The model comprised by the two-subsystems could reproduce the observed BMP-  
 226 induced WNT bistability (Fig. 4C, S6). Short BMP pulses allowed the β-catenin variable  
 227 to remain in a low steady state, while longer BMP pulses resulted in the β-catenin variable  
 228 converging to a high steady state where it remained even in the absence of BMP (Fig.  
 229 4C). The model also reproduced the signaling dynamics obtained under BMP withdrawal  
 230 without Noggin and the BMP concentration-dependent increase of WNT signaling (Fig.  
 231 S6). Interestingly, as in the experimental data, while a 16h pulse of BMP followed by

232 Noggin inhibition resulted in  $\beta$ -catenin returning to a low value, a 16h pulse of BMP  
 233 followed by withdrawal without Noggin resulted in  $\beta$ -catenin auto-activating to a high level  
 234 by 48 hours (Fig. S3A-C, S6A,C). Thus, modeling supports the idea that residual BMP in  
 235 the media explains why a 16h pulse of BMP 10 ng/mL is sufficient to induce mesoderm if  
 236 the BMP containing media is replaced by media alone, while longer pulses are needed if  
 237 Noggin is used.

238

### 239 Mesoderm induction correlates with a slow loss of pluripotency

240 Our next goal was to understand the dynamics of the cell fate transitions to understand  
 241 how signaling dynamics determined the observed cell fates. We treated hPSCs with  
 242 pulses of 10 ng/mL BMP of varying durations and examined marker gene expression at  
 243 16h, 24h, 32h and 48h after treatment (Fig. 5A-C, S7). When cells were not exposed to  
 244 BMP, cells remained pluripotent as marked by high SOX2 expression at every time point

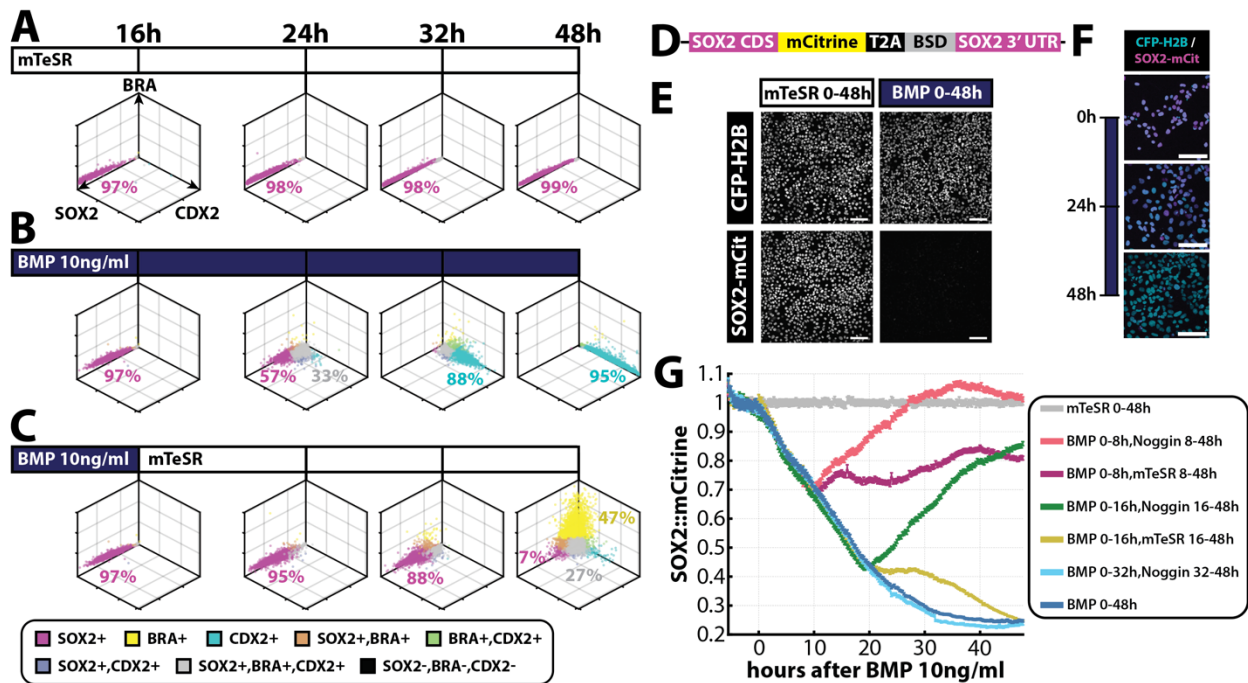

**Figure 5. Cell fate transitions under BMP treatment. (A-C)** Scatter plots of the quantifications of SOX2, BRA and CDX2 under the treatments mTeSR 0-48h (A), BMP 10ng/mL 0-48h (B), and BMP 10ng/mL 0-16h followed by mTeSR 16-48h (C), at 16h, 24h, 32h, and 48h. Each dot corresponds to a single cell, and its color marks the cell fate assigned to the cell as shown in the legend at the bottom. **(D)** Schematic of resulting mRNA transcribed from the labelled SOX2 allele after CRISPR-Cas-mediated SOX2-mCitrine-T2A-BSD knockin. The blasticidin resistance protein (BSD) facilitates selection of labelled cells. T2A is a self-cleaving peptide that enables separation of BSD from SOX2::mCitrine. **(E)** Representative images of hPSCs with mCitrine-labelled SOX2 and the nuclear marker CFP::H2B. (Left) Under no treatment. (Right) SOX2 expression is lost after 48h of 10ng/mL BMP4 treatment. **(F)** Confocal microscopy images of live SOX2::mCitrine hPSCs at 0h, 24h, and 48h after treatment with 10ng/mL BMP4. **(G)** SOX2::mCitrine average nuclear intensity after the indicated treatments. Scale bars: 100um.

245 observed (Fig. 5A). On the other hand, if hPSCs were exposed to BMP for the whole 48h,  
246 a pluripotent-to-extraembryonic transition was observed between 24 and 32 hours, when  
247 cells downregulated SOX2 and then upregulated CDX2 (Fig. 5B). Importantly, no BRA  
248 expression was observed in this condition at any time point, indicating that cells transition  
249 directly to extraembryonic without going through an intermediate mesoderm state. In the  
250 experimental conditions where mesoderm differentiation was obtained, such as 16 hours  
251 of 10 ng/mL BMP4 followed by mTeSR, a slow SOX2 downregulation was observed  
252 followed by a late BRA upregulation, starting after 32h of induction (Fig. 5C). This late  
253 mesoderm induction is consistent with recent studies that propose that SOX2 levels need  
254 to be low for Wnt to induce mesoderm differentiation (Blassberg et al., 2022, 2).

255  
256 In order to observe gene expression dynamics with a higher time resolution, we used  
257 CRISPR-Cas9 genome engineering to insert mCitrine at the endogenous locus to form a  
258 C-terminal fusion with SOX2 (SOX2::mCitrine) (Fig. 5D, S8, Materials and Methods). To  
259 facilitate nuclear identification and analysis, the cells also express CFP::H2B, which was  
260 incorporated into the genome using the ePiggyBac transposable element system  
261 (Lacoste et al., 2009). Treatment of these cells with BMP4 showed a rapid downregulation  
262 of SOX2, with undetectable expression after two days of treatment (Fig. 5E,F, S8A,B),  
263 and antibody staining for SOX2 and other pluripotency markers showed that these cells  
264 shared similar dynamics with WT hPSCs (Fig. S8).

265  
266 We imaged SOX2::mCitrine cells under different BMP4 treatments and observed the  
267 SOX2 dynamics for two days. Consistent with results above, SOX2 expression was  
268 maintained in cells that were not exposed to BMP4 (Fig. 5G). On the other hand, SOX2  
269 expression rapidly began to decay under BMP4 treatment, with a rate that was initially  
270 proportional to BMP4 concentration (Fig. 5G, S8D). If BMP4 was withdrawn from the  
271 media early enough, SOX2 expression returned to high levels, while if cells were induced  
272 with long pulses of BMP4, they lost SOX2 expression. Interestingly, with a 16-hour pulse  
273 of 10ng/mL BMP4, which leads to peak mesoderm differentiation, SOX2 downregulation  
274 slowed after 16 hours. A second phase of SOX2 decay led to hPSCs eventually losing  
275 SOX2 expression but later than cells induced under longer BMP4 pulses (Fig. 5G). These  
276 results show that mesoderm induction correlates with a slow SOX2 decay after BMP  
277 withdrawal.

278  
279 The initial decay of SOX2 expression is strongly correlated with the integral of BMP4 in  
280 time (Fig. S9A-E) suggesting that there is a tradeoff between the magnitude and the  
281 duration of signaling in the dissolution of the pluripotent state. This correlation no longer  
282 holds in later times (Fig. S9E), and the total integral of BMP4 signal does not directly  
283 translate to cell fate (Fig. S9F). This supports the hypothesis that BMP initially controls  
284 the exit from pluripotency, and the combinatorial interpretation of BMP and endogenous  
285 WNT signaling controls the decision between ExE and mesoderm fates.

286  
287 Taken together, these results suggest that BMP4 concentration initially regulates SOX2  
288 expression, which rapidly starts to decay after BMP4 treatment with a rate that is



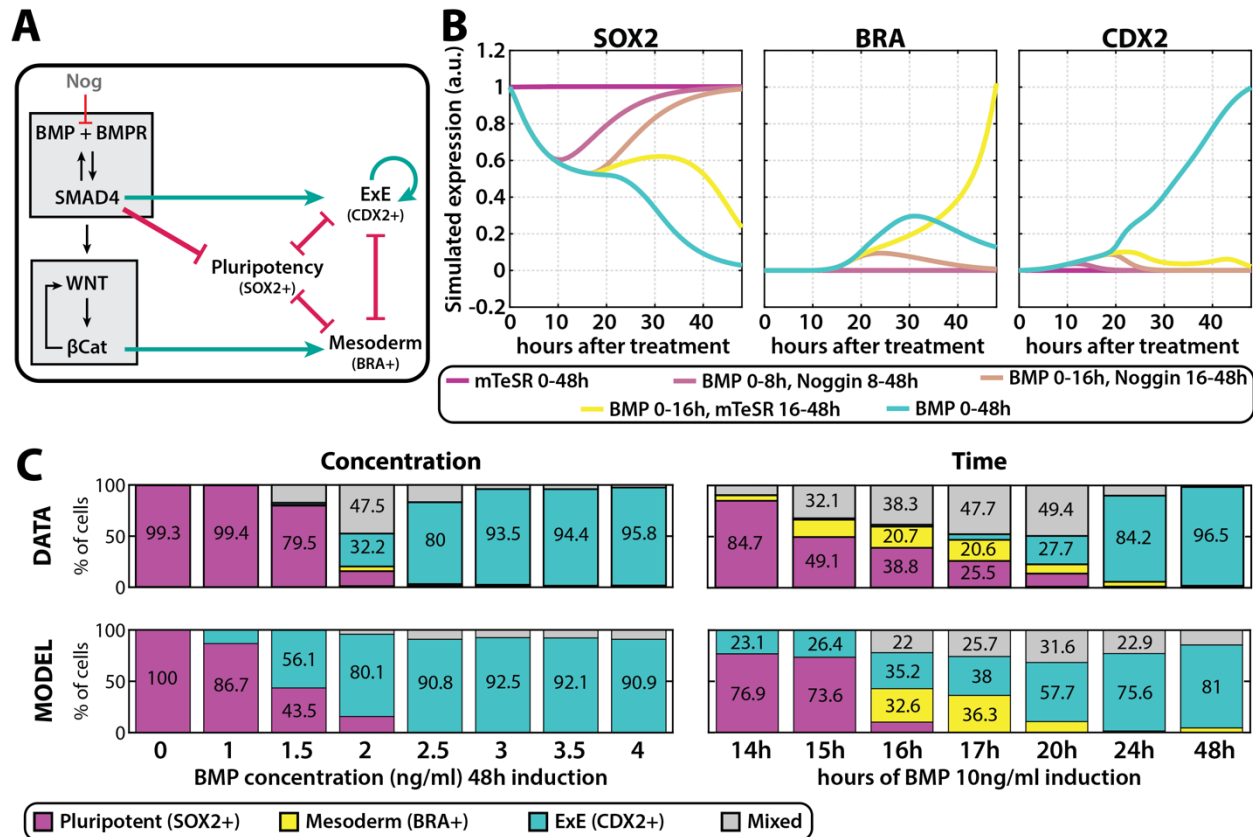

**Figure 6. A minimal cell fate network can recapitulate the observed dynamics. (A)** Schematics of the coupling of the signalling network and the minimal cell fate network. **(B)** Simulated SOX2, BRA and CDX2 dynamics from the model in (A) for the indicated experimental conditions. **(C)** Experimental (top) and simulated (bottom) cell fate proportions under constant low concentrations (left) and pulses of BMP 10ng/mL (right).

289 proportional to SMAD4 activity. If BMP4 is removed early, SOX2 expression recovers to  
 290 baseline and cells remain pluripotent. Long BMP4 treatments produce a direct  
 291 pluripotency-to-ExE transition, without going through an intermediate mesoderm  
 292 state. On the other hand, intermediate BMP4 treatments produce a two-phased SOX2  
 293 downregulation, with an initial fast partial decay followed by a slow decay to baseline  
 294 which correlates with the onset of mesoderm induction.

295

### 296 A simple network model can recapitulate the observed dynamics

297 To understand how signal dynamics controlled the observed cell fate transitions, we  
 298 created a minimal cell fate network (CFN) model, where the nodes of the network  
 299 correspond to the cell fates observed, i.e. pluripotent, mesodermal, and extra-embryonic,  
 300 characterized by high SOX2, BRA, or CDX2 expression, respectively. We coupled this  
 301 CFN model with the signaling model described above (Fig. 6A). For simplicity, we  
 302 modelled SOX2, BRA and CDX2 expression in time as a proxy for the corresponding cell  
 303 fates. To generate mutually exclusive cell states, we included mutually repressive  
 304 interactions between SOX2, BRA and CDX2 (Fig. 6A).

305

306 Secondly, as previous studies have shown and our data supports (Chhabra and  
307 Warmflash, 2021; Li et al., 2013; Minn et al., 2020; Xu et al., 2002; Yang et al., 2021),  
308 BMP activation of SMAD complexes leads to transcription of ExE markers, such as CDX2,  
309 and therefore we included activation of CDX2 expression by nuclear SMAD4 through a  
310 Hill equation (Fig. 6A, Supplemental Information). In this regard, we also observed that  
311 CDX2 and ISL1 expression levels, once active, remained high even if BMP was  
312 withdrawn from the media, suggesting a possible auto-regulation of ExE markers, which  
313 we modelled by an additive auto-activation (Fig. 6A, Supplemental Information).

314  
315 As WNT signals are necessary for BMP-induced mesoderm formation (Chhabra et al.,  
316 2019; Martyn et al., 2018; Nemashkalo et al., 2017), we considered that mesoderm  
317 markers are upregulated through  $\beta$ -catenin activation by WNT, and modelled the  
318 activation of BRA expression through a Hill function of  $\beta$ -catenin levels (Fig. 6A,  
319 Supplemental Information).

320  
321 Moreover, the SOX2 expression dynamics observed in Fig. 5G suggested a  
322 downregulation of SOX2 by BMP, through a SMAD intermediate, as SOX2 expression  
323 begins to decay rapidly upon BMP treatment, at which stage neither Wnt signaling, as  
324 reflected in nuclear  $\beta$ -catenin, nor mesoderm or ExE markers are yet upregulated (Fig.  
325 3H, 5A-C). In fact, as mentioned above, the initial rate of SOX2 decay showed a strong  
326 correlation with SMAD4 levels for different concentrations and durations (Fig. S9). Hence,  
327 a direct inhibition of SOX2 expression levels by SMAD4 was included in the CFN model  
328 (Fig. 6A, Supplemental Information).

329  
330 This minimal deterministic CFN model was fitted to simplified expression levels obtained  
331 in a subset of experiments by using a Monte Carlo optimization algorithm, the details of  
332 which can be found in the Supplemental Information. The model was compatible with the  
333 dynamics observed in the data such as direct pluripotency-to-ExE transition without  
334 expressing BRA under constant 2-day BMP4 induction. The model was also able to mimic  
335 the slow SOX2 decay under an intermediate pulse of BMP4 which also resulted in a late  
336 BRA upregulation (Fig. 6B). Importantly, the model was able to reproduce features and  
337 conditions that were not used in the fitting, such as the observed SOX2 dynamics for  
338 different BMP4 concentrations, and that a longer pulse of 5ng/ml BMP is necessary for  
339 cells to differentiate to the ExE than under 10ng/ml BMP in followed by mTeSR withdrawal  
340 (Fig. S10).

341  
342 Having fitted the deterministic CFN model to the available data, we generated a stochastic  
343 version by considering an additive white noise of strength  $\xi$ , to test whether the model  
344 could reproduce the cell fate proportions observed in the data. We fixed all the parameters  
345 from the deterministic model and fitted only the single noise parameter and the initial  
346 distribution of the SOX2 expression to the cell fate proportions obtained in a subset of  
347 experimental data (Supplemental Information). We found that without modification to any  
348 of the parameters from the deterministic model, the stochastic model reproduced the  
349 observed BMP morphogen effect in time and the low mesoderm induction at any low

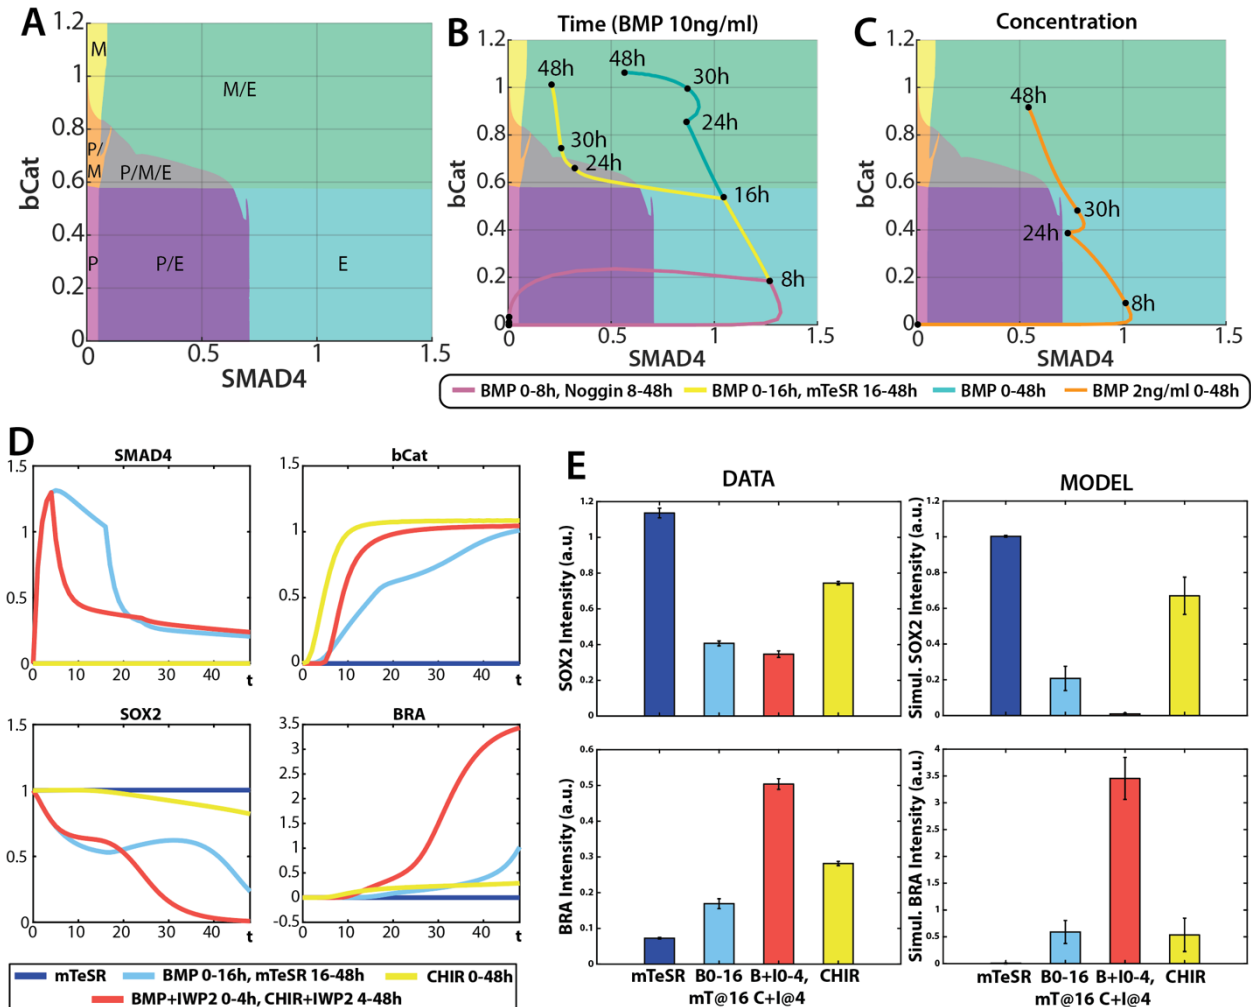

**Figure 7. Cell fate is a combinatorial response to BMP and WNT. (A)** Fate map defined by BMP (SMAD4) and WNT (bCat) levels obtained from the model in Figure 6. P = Pluripotency. M = Mesoderm. E = Extra-embryonic. **(B)** Signaling trajectories on the fate map for the indicated BMP10ng/mL pulses. **(C)** Simulated SMAD4, b-Catenin, SOX2 and BRA dynamics for the conditions indicated on the legend. **(D)** Simulated prediction (right) SOX2 and BRA intensities for the same conditions as in (D), and corresponding experimental confirmation (left).

350 constant concentration (Fig. 6C). Taken together the simple cell fate network model  
 351 recapitulated the dynamics and cell proportions observed in the data including in a large  
 352 amount of data not used to fit the model parameters.

353

### 354 Cell fate is a combinatorial response to BMP and WNT

355 With the obtained model, we then aimed to understand how the signals BMP and WNT  
 356 controlled cell fate determination. We created a phase diagram, or fate map, that shows,  
 357 for a given value of SMAD4 and  $\beta$ -catenin, which cell fates are stable, or, in other words,  
 358 accessible, in the deterministic model under those signaling levels (Fig. 7A). For example,  
 359 for low SMAD4 and  $\beta$ -catenin levels, only the pluripotent (P; SOX2+) state is stable and,



360 therefore, cells remain pluripotent under low BMP and WNT levels. On the other hand,  
361 for high SMAD4 values and low  $\beta$ -catenin levels, the only stable state is the ExE (E;  
362 CDX2+) fate, therefore the model suggests that cells would eventually adopt the ExE fate  
363 if induced with high BMP while inhibiting WNT signaling. For high SMAD4 and high  $\beta$ -  
364 catenin levels, a bistable region is defined, where both the mesodermal (M; BRA+) and  
365 ExE fates are accessible, and cells will become one or the other depending on the initial  
366 state of the cell.

367  
368 However, cells are normally not exposed to constant SMAD4 and  $\beta$ -catenin levels, but  
369 they experience the signaling dynamics discussed previously, some of which are  
370 measured in Fig. 3. Combining these signaling trajectories and the fate map, the model  
371 explains the experimental observations by showing that cell fate is a combinatorial  
372 response to BMP and WNT. Under short pulses of BMP, endogenous WNT is not  
373 activated, so the signaling trajectory moves to a high BMP region for a short period of  
374 time after which it goes back to a low BMP, low WNT profile and cells stay pluripotent  
375 (Fig. 7B, pink curve, and S11). Under constant high BMP, endogenous WNT is activated,  
376 and the signal trajectory ends up in a region of high BMP and high WNT, where both ExE  
377 and mesoderm differentiation are possible, however, the trajectory lays in the basin of  
378 attraction of the ExE fate and therefore cells adopt this fate (Fig. 7B, blue curve). Under  
379 medium durations where WNT becomes self-sustained, even though the signal trajectory  
380 initially moves in a high BMP region for some time, decreasing the SOX2 levels in the  
381 cell, the withdrawal of the BMP signal situates the signal trajectory in a region of tristability  
382 (Fig. 7A-B, gray region), which slows down the decay of pluripotent markers and prevents  
383 cells from increasing the expression of ExE markers (Fig. 7B, yellow curve, and S11).  
384 This allows cells to become mesoderm once WNT increases and the signaling trajectory  
385 moves to the bistable ExE and mesoderm region (Fig. 7B, yellow curve, and S11). On the  
386 other hand, constant low concentrations result in a slow WNT upregulation, and therefore  
387 the signal trajectory stays in a pluripotency or ExE-promoting region for too long, and are  
388 inefficient at promoting mesoderm differentiation (Fig. 7C, S11). Taken together, the  
389 model unveils a strategy for efficiently inducing mesoderm with BMP: induction with a  
390 high BMP dose that rapidly increases endogenous WNT signaling, after which BMP must  
391 be withdrawn for cells to become mesoderm over ExE.

392  
393 Here we have shown that by pulsing BMP signal, we can obtain a relatively high  
394 population of cells that exclusively expresses the mesoderm marker BRA after 2 days.  
395 However, this population is heterogeneous and we speculated that this was due to the  
396 limitations of the dynamics of endogenous WNT in response to BMP. Inducing hPSCs by  
397 CHIR results in a strong, rapid and sustained WNT response (Massey et al., 2019) and  
398 yields a very high fraction of mesoderm cells (Fig. S11E). However, this induction is slow,  
399 most of the cells still expressing SOX2 after 2 days of induction (Fig. 7E, S11), and taking  
400 3 days to obtain a homogeneous mesodermal population (Fig. S11E). Modelling CHIR  
401 through  $\beta$ -catenin activation (Fig. 4) we could reproduce this effect (Fig. 7D,E, yellow  
402 condition). We wondered whether we could take advantage of the insights above to speed  
403 up mesoderm induction by CHIR. Our goal was to find a 2-day protocol that yielded the

404 highest BRA expression by varying a sequence of inductions with BMP and CHIR. Our  
405 model suggested that induction of mesoderm by CHIR was slow because of a strong  
406 SOX2 inhibition of the mesoderm state. We reasoned that a pulse of BMP4 signal could  
407 be used to destabilize the pluripotency state which, if then followed by CHIR induction,  
408 could yield a higher proportion of mesoderm cells by 48 hours. Our model predicted that  
409 a 4-hour pulse of BMP was sufficient for this purpose, and if followed by 44 hours of CHIR,  
410 would result in a very high BRA expression by day 2 (Fig. 7D,E, red condition). Indeed,  
411 experimentally, by day 2 we obtained higher BRA expression and much more complete  
412 SOX2 downregulation than with CHIR alone (Fig. 7E, yellow condition). The model  
413 explains the combinatorial effect between BMP and Wnt signals in mediating decisions  
414 between the pluripotent, mesoderm and ExE fates and offers a platform to rationally  
415 design more optimal protocols. Taken together, our study highlights how understanding  
416 signaling dynamics can be exploited for developing efficient differentiation protocols.

417

## 418 Discussion

419

420 In this study, we have unveiled a combinatorial mechanism by which BMP and  
421 downstream endogenous WNT signaling combinatorially control the cell state transitions  
422 observed in mammalian gastrulation and previous *in vitro* studies. We showed a BMP-  
423 induced morphogen effect in the duration but not the concentration of signaling, indicating  
424 that duration and concentration of BMP signal are not interchangeable in this context. In  
425 particular, a specific pulse of high concentration of BMP4 signal is much more efficient at  
426 inducing a mesoderm-like state than any constant concentration. Taking advantage of  
427 signaling and fate reporter cell lines, we showed that these results depend on an  
428 endogenous BMP-induced WNT bistability. A simple minimal cell fate network model  
429 explains how the observed cell state transitions are regulated by combinatorial  
430 interpretation of these two signals. Induction with a short BMP pulse is not enough to  
431 induce endogenous WNT signaling, resulting in hPSCs remaining in the initial pluripotent  
432 state. Long pulses of high BMP4 concentration, on the contrary, induce endogenous WNT  
433 signals but a high BMP signal overrides the endogenous WNT resulting in extraembryonic  
434 differentiation. A pulse of BMP4 of intermediate length that activates WNT autoregulation  
435 results in efficient mesoderm differentiation. At lower constant concentrations, WNT  
436 activation is slow and cells are therefore pushed towards an ExE fate before experiencing  
437 this signal, explaining why low doses of BMP are not interchangeable with a pulse of a  
438 high BMP dose. Taken together, our study reveals an underlying logic where, in order to  
439 induce efficient mesodermal induction, BMP signaling needs to be sufficiently strong to  
440 rapidly induce endogenous WNT signaling upregulation, but sufficiently short for cells to  
441 differentiate in a low BMP, high WNT environment.

442

443 Our work adds to the growing body of knowledge on how the dynamics of signals are  
444 interpreted by downstream regulatory networks. In the case of Shh signaling in the murine  
445 neural tube, there is an effective tradeoff between duration and concentration so that  
446 shorter durations at higher concentration are sufficient to induce the same fates as longer  
447 exposure to lower concentrations (Dessaud et al., 2007). In the case of the three-way

448 decision between pluripotent, primitive streak mesoderm, and extraembryonic amnion,  
449 the situation is more complex and relies on the interplay between BMP and Wnt signaling,  
450 and cannot be predicted by a parameter of any one of these pathways. Interestingly, we  
451 observed that the initial decrease in SOX2 correlated very well with the cumulative  
452 integral of BMP signaling as measured by SMAD4 across several different time courses  
453 of applied BMP signal (Fig. S9E). This suggests that the initial dissolution of the  
454 pluripotent state by BMP signaling may indeed be controlled by the integral of signaling,  
455 but that the decision between different potential fates relies on the interpretation of  
456 multiple pathways. Indeed, when Wnt signaling is inhibited so that cells can only switch  
457 from the pluripotent to the extraembryonic fate, the fraction of cells adopting this fate is  
458 well predicted by the integral of the BMP signal (Teague and Heemskerk, submitted).

459  
460 It is also important to note that measuring the intensity of signaling with a reporter is  
461 essential as the external concentration doesn't translate directly into signaling activity. In  
462 the case of BMP signaling, the activation of the SMAD proteins is switch-like and  
463 regulated over a narrow range of concentrations, so that it is difficult to regulate the  
464 effective activity simply by changing the concentration of ligand in the media (Heemskerk  
465 et al., 2019). Further, the loss of the BMP from the media over time causes more  
466 prolonged signaling at higher doses (Heemskerk et al., 2019), making it difficult to  
467 decouple duration from concentration. Together these features mean that even though  
468 the dissolution of pluripotency is responsive to the integral of signaling, in practice, the  
469 duration of signal is more easily controlled, and is more likely to be the determining factor  
470 in vivo.

471  
472 It has recently been proposed that BMP4 differentiation rapidly becomes irreversible due  
473 to positive feedback through GATA3 (Gunne-braden et al., 2020). In that study, a one-  
474 hour pulse of BMP4 was sufficient to induce irreversible differentiation in hPSC colonies,  
475 which is in clear contradiction with our results (Fig. 1, 2, S1, S2). Irreversible differentiation  
476 following short exposure to BMP is contradictory to several studies from our lab and  
477 others (Chhabra et al., 2019; Etoc et al., 2016; Jo et al., 2022; Nemashkalo et al., 2017)  
478 that showed that BMP signaling is rapidly downregulated by small molecule or  
479 extracellular protein inhibitors and that pulses of longer than 10 or 24 hours are needed  
480 to induce differentiation in both in micropatterned colonies and regular culture,  
481 respectively. Apparently irreversible differentiation is likely due to incomplete removal of  
482 the BMP in the media (Fig. S2C-D), and indeed we found using a live cell reporter for  
483 BMP signaling that signaling activity remained substantially above baseline when media  
484 containing high doses of BMP was replaced by media alone, however, treatment with  
485 Noggin quickly abrogated this continued signaling. Further experiments with washing  
486 confirmed that BMP ligands cannot be removed from the media by washing alone (see  
487 Fig. S2C).

488  
489 Our results showed that under BMP induction of hPSCs there is a relatively narrow  
490 window of durations of BMP exposure which are able to specify mesoderm, and this was  
491 related to the dynamics of the induced endogenous WNT signaling. This highlights the



492 need to consider dynamics when developing in vitro differentiation protocols. In particular,  
493 while here we investigated the importance of the duration of a single pulse of BMP, more  
494 complex time courses of BMP stimulation are possible, and it would be interesting to  
495 determine the optimal time courses for achieving different fates. In vivo, while the same  
496 cascade of signals controls gastrulation in other mammals, there is a wide range of  
497 developmental time scales, and it is unclear by what mechanism the window of BMP  
498 duration needed might be matched to the developmental time scale. Interestingly, recent  
499 studies have uncovered cell movement as a mechanism that controls the temporal  
500 exposure to morphogens (Fulton et al., 2022). Further work could elucidate whether the  
501 differences might be due to differential protein stability and cell cycle duration as has been  
502 recently proposed in other contexts (Matsuda et al., 2020; Rayon et al., 2020).

503  
504 We show that there is a form of memory in the WNT signaling so that transient exposure  
505 to BMP can be sufficient to induce WNT in a sustained fashion. This is reminiscent of  
506 the interplay between WNT and NODAL signaling in which cells remember prior exposure  
507 to WNT, which alters their subsequent response to NODAL (Yoney et al., 2018; Yoney et  
508 al., 2022). The mechanisms are different as in the case described here BMP leads to  
509 ongoing WNT signaling, likely through sustained expression of WNT ligands, while WNT  
510 affects the interpretation of NODAL by inducing EOMES without a subsequent  
511 requirement for the continuation of WNT activity.

512  
513 A popular recent approach based in the Waddington landscape metaphor has been  
514 shown to be a powerful yet simple way to study cell fate transitions in different contexts  
515 (Camacho-Aguilar et al., 2021; Coomer et al., 2022; Corson and Siggia, 2012; Corson  
516 and Siggia, 2017; Huang, 2012; Mojtahedi et al., 2016; Sáez et al., 2022; Valcourt et al.,  
517 2021). In these models, the differentiation of a cell is depicted as ball rolling down a  
518 landscape of hills and valleys, that represent the different cell types the stem cell can  
519 differentiate into. In particular, we and others have shown that using dynamical systems  
520 theory one can enumerate the nature of the possible bifurcations, and parametrize these  
521 through the signals to build the landscape model, which then can be quantitatively fitted  
522 to the data (Camacho-Aguilar et al., 2021; Sáez et al., 2022). These studies, however,  
523 lacked signaling dynamics data and the underlying bifurcations had to be guessed and  
524 then validated through fitting. Also, these models have not been compared yet to any  
525 more mechanistic models. Here using a cell fate network model, which although simple  
526 contains some mechanistic knowledge, we have deciphered the underlying fate map  
527 without any prior knowledge about the candidate bifurcations. Interestingly, our three  
528 mutually repulsive state network contains the bifurcations present in the elliptic-umbilic  
529 catastrophe, as had been proposed before (Rand et al., 2021). To our knowledge, this is  
530 the first experimental system that confirms this idea. We believe that our results provide  
531 a foundation to quantitatively compare mechanistic and landscape models using  
532 quantitative data on signaling dynamics.

533  
534 Much work has been done to decipher the dynamics of signals that control the patterning  
535 of micropatterned hPSC colonies treated with BMP4 (Chhabra et al., 2019; Etoc et al.,

536 2016; Heemskerk et al., 2019; Warmflash et al., 2014). These studies have unveiled that,  
537 initially, there is a homogeneous response to BMP4 across the whole colony, which is  
538 restricted to the edge via receptor localization and accumulation of Noggin at the colony  
539 center between 10 and 20 hours after treatment (Etoc et al., 2016; Heemskerk et al.,  
540 2019). Subsequently, around 30h, waves of WNT and Nodal signaling start near the edge  
541 of the colony and move inwards, spatially correlating with a ring of BRA-positive  
542 mesodermal cells (Chhabra et al., 2019; Heemskerk et al., 2019). Although our results  
543 have been obtained in a culture with lower cell density where self-organized patterning  
544 does not occur, they are consistent with the observations of a pulse of BMP throughout  
545 the colony which induces endogenous WNT signal. The cells that adopt a mesodermal  
546 fate are those that are displaced from the edge and therefore only experience transient  
547 BMP signaling followed by upregulation of Wnt signaling to high levels. Thus, the model  
548 developed here could be a good starting point to build a spatial model to understand how  
549 patterns arise from the interplay of dynamic signaling and combinatorial interpretation.

550

551

552

553

## 554 **Materials and Methods**

555

### 556 **Cell lines.**

557 The cell lines used were ESI017 (NIHhPSC-11-0093), ESI017 GFP:: $\beta$ -Catenin RFP::H2B  
558 (Massey et al., 2019), RUES2 GFP::Smad4 RFP::H2B (Nemashkalo et al., 2017), and  
559 ESI017 SOX2::mCitrine CFP::H2B (this study). ESI017 cells were obtained directly from  
560 ESIBIO while RUES2 were a gift of Ali Brivanlou (Rockefeller University). The identity of  
561 these cells as pluripotent cells was confirmed via triple staining for pluripotency markers  
562 OCT4, SOX2, and NANOG. All cells were routinely tested for mycoplasma contamination  
563 and found negative.

564

### 565 **Cell Culture, Treatments, and Differentiation.**

566 All cell lines were maintained in pluripotency maintenance culture as described in  
567 (Nemashkalo et al., 2017). ESI017 SOX2::mCitrine CFP::H2B were maintained in mTeSR  
568 Plus medium (STEMCELL Technologies; 100-0276) and Blasticidin (5 $\mu$ g/ml; A.G.  
569 Scientific; B-1247-SOL) for selection, which was removed before experiments.

570 Ibidi  $\mu$ -Slide 8 Well plates (Ibidi; 80826) were used for experiments, which were coated  
571 with Matrigel (5 $\mu$ l/ml; Corning; 354277) diluted in DMEM/F12 (VWR;45000-344). For all  
572 experiments, cells were seeded into mTeSR1 medium (STEMCELL Technologies;  
573 85857) containing rock inhibitor Y27672 (10 $\mu$ M; STEMCELL Technologies; 05875) at a  
574 density of 4 x 10<sup>4</sup>/cm<sup>2</sup> (except when noted otherwise). Treatment started 21 hours after  
575 seeding, and media was always changed every 24 hours, and when performing the  
576 indicated specific treatments.

577 The following recombinant proteins and small molecules were used: BMP4 (R&D  
578 Systems; 314BP050), Noggin (500ng/ml; R&D Systems; 6057-NG-100), IWP2  
579 (Stemgent; 040034; 3 $\mu$ M), CHIR99021 (24 $\mu$ M; MedChem Express; HY-10182).

580

581 For micropatterning experiments, these were done in a 96-well plate (CYTOO) of 700  $\mu\text{m}$   
582 circular micropatterns. Coating and seeding were done as previously described by  
583 (Warmflash et al., 2014). Briefly, wells were coated with Human Recombinant Laminin  
584 511 (Fisher Scientific) in a 1:20 dilution in PBS with calcium and magnesium for 3 hours  
585 at 37 °C. hESCs were then seeded as single cells and maintained in mTeSR medium.  
586 After overnight incubation, cells were treated with 50 ng/ml BMP4 (R&D systems) for 48  
587 hours and with 1 hour pulse of 50 ng/ml BMP4 (R&D systems), as previously described  
588 in (Gunne-braden et al., 2020), with or without 100 ng/ml of Noggin (Fisher Scientific).  
589 The following recombinant proteins and small molecules were used: BMP4 (R&D  
590 Systems; 314BP050), Noggin (250ng/ml; R&D Systems; 6057-NG-100), IWP2  
591 (Stemgent; 040034; 3 $\mu\text{M}$ ), CHIR99021 (24 $\mu\text{M}$ ; MedChem Express; HY-10182).

592

### 593 **Plasmids and Generation of SOX2-mCitrine-Labeled hPSC Cell Line.**

594 We used CRISPR-Cas9 technology for gene editing, where the ESI017 hPSC line was  
595 used as the parental line. We used previously published constructs to fuse mCitrine  
596 directly with SOX2 at the C-terminus of the SOX2 coding sequence (Martyn et al., 2018).  
597 The SOX2 homology donor consists of a 1-kb homology arm, an  
598 mCitrine::T2A::blastidicin cassette, and a 1-kb right homology arm. Cas9 expression  
599 plasmid, homology donor DNA (Plasmid AW-P46), and guide RNA (Plasmid AW-P45;  
600 GTGCCCGGCACGGCCATTAA) were nucleofected in hPSCs using the P3 Primary Cell  
601 4D-Nucleofector X Kit (Lonza; V4Xp-3012), and positive transformants were selected with  
602 blastidicin (10 $\mu\text{g}/\text{ml}$ ; A.G. Scientific; B-1247-SOL) and CloneR (STEMCELL  
603 Technologies; 05889) for two days, after which cells were passaged and single clones  
604 were handpicked and amplified. Sanger sequencing was performed to screen and confirm  
605 a successful clone (Primer sequences are listed in Table 1). After establishment, the  
606 stable line was checked for pluripotency markers, i.e. OCT4, SOX2 and NANOG  
607 expression, as well as BMP differentiation both in regular culture and micropatterning,  
608 and was found indistinguishable from WT ESI017 hPSCs.

609 An ePiggyBac (ePB) master vector based on the pBSSK backbone (Lacoste et al., 2009),  
610 harboring transposon-specific inverted terminal repeat sequences (ITR) was modified to  
611 deliver a nuclear marker CFP::H2B (Plasmid AW-P68). ePB master vector and helper  
612 (Plasmid AW-27) were nucleofected into the established SOX2::mCitrine cell line using  
613 the P3 Primary Cell 4D-Nucleofector X Kit (Lonza; V4Xp-3012). G-418 (40ng/mL;  
614 ThermoFisher; 10131035) started two days after nucleofection and lasted for at least 7  
615 days.

616

### 617 **Table 1**

| Region                   | Forward primer         | Reverse primer         |
|--------------------------|------------------------|------------------------|
| SOX2::mCitrine           | ccagctcgagacctacatgaa  | TGGCGGATCTTGAAGTTCACCT |
| mCitrine::T2A::BSD::SOX2 | AGGTGAACTTCAAGATCCGCCA | GTCATTTGCTGTGGGTGATGGG |

618

619

### 620 **Immunofluorescence Antibody Staining.**

621 Cells were fixed with 4% PFA and stained as described in (Nemashkalo et al., 2017).  
622 Antibodies and dilutions used are listed in Table 2.

623

624 **Table 2**

| Protein   | Species | Dilution | Vendor                       | Catalog no. |
|-----------|---------|----------|------------------------------|-------------|
| Sox2      | Rabbit  | 1:200    | Cell Signalling Technologies | 23064s      |
| Brachyury | Goat    | 1:300    | R&D Systems                  | AF2085      |
| Brachyury | Rabbit  | 1:400    | R&D Systems                  | MAB20851    |
| Cdx2      | Mouse   | 1:100    | Biogenex                     | MU392A-5UC  |
| Isl1      | Mouse   | 1:50     | DSHB                         | 39.4D-5     |
| Oct4      | Mouse   | 1:400    | BD Biosciences               | 611203      |
| Nanog     | Mouse   | 1:400    | BD Biosciences               | 560482      |
| Nanog     | Goat    | 1:200    | R&D Systems                  | AF1997      |
| Hand1     | Goat    | 1:200    | R&D Systems                  | AF3168      |
| Gata3     | Rabbit  | 1:100    | ThermoFisher                 | PA1-101     |
| Tbx6      | Goat    | 1:200    | R&D Systems                  | AF4744      |

625

626

### 627 **Imaging and Analysis.**

628 Imaging acquisition was done on an Olympus/Andor spinning disk confocal microscope  
629 with a 20x, 0.75NA air objective.

630 For live imaging experiments, reporter cell lines were maintained in antibiotic selection  
631 for the H2B fluorescent marker for at least three days and stopping 2 days before seeding,  
632 at the latest, to maximize the number of fluorescent cells in the culture. Time-lapse  
633 imaging intervals were 15 minutes, and Z-stacks were acquired in three planes spaced  
634 2.5 $\mu$ M apart. During imaging, temperature (37 °C), humidity (~50%), and CO<sub>2</sub> (5%) were  
635 controlled, and media change was performed without moving the plate from the stage. 8  
636 positions of each condition were selected for imaging.

637 Image analysis was performed using Ilastik (Berg et al., 2019; Sommer et al., 2011) for  
638 initial segmentation and custom-written MATLAB code available at  
639 [https://github.com/warmflashlab/Camacho-Aguilar2022\\_BMPWNT](https://github.com/warmflashlab/Camacho-Aguilar2022_BMPWNT) for further analysis.  
640 Smad4 dynamics was quantified as the nuclear to cytoplasmic Smad4 ratio, (Heemskerck  
641 et al., 2019). Nuclear protein expression was measured by mean nuclear intensity and  
642 normalized by mean nuclear DAPI to correct for intensity variations due to optics.

643 For the analysis of the micropatterning experiment, stitching of the colonies was  
644 performed in Fiji using the algorithm in (Preibisch et al., 2009). Segmentation and mean  
645 intensity quantification were done on Ilastik (Berg et al., 2019; Sommer et al., 2011) and  
646 custom software written in MATLAB (MathWorks), previously described in (Warmflash et  
647 al., 2014).

648

649



650

651 **Cell Fate Classification.**

652 (see Appendix)

653

654

655 **Mathematical Models.**

656 (see Appendix)

657

658

659 **Acknowledgements**

660 We thank Idse Heemskerk, Seth Teague, Francisco-Jesús Castro-Jiménez, Nathan Lord,  
661 and Eric Siggia for helpful discussions on the project. Sapna Chhabra for performing the  
662 experiment in Fig S8C and for helpful feedback on the project. Joseph Massey for sharing  
663 helpful pieces of code for analyzing live-cell imaging data. Cecilia Guerra and Lizhong Liu  
664 for technical assistance with experiments; and all the members of the Warmflash lab for  
665 helpful feedback. The work was supported by grants to AW from the National Science  
666 Foundation (MCB-1553228 and MCB-2135296) and the Simons Foundation (511079).

667

668

669

670 **Arnold, S. J. and Robertson, E. J.** (2009). Making a commitment: cell lineage allocation and axis  
671 patterning in the early mouse embryo. *Nature reviews Molecular cell biology* **10**, 91–  
672 103.

673 **Bardot, E. S. and Hadjantonakis, A.-K.** (2020). Mouse gastrulation: Coordination of tissue  
674 patterning, specification and diversification of cell fate. *Mechanisms of Development*  
675 **163**, 103617.

676 **Ben-Haim, N., Lu, C., Guzman-Ayala, M., Pescatore, L., Mesnard, D., Bischofberger, M., Naef,**  
677 **F., Robertson, E. J. and Constam, D. B.** (2006). The nodal precursor acting via activin  
678 receptors induces mesoderm by maintaining a source of its convertases and BMP4.  
679 *Developmental cell* **11**, 313–323.

680 **Berg, S., Kutra, D., Kroeger, T., Straehle, C. N., Kausler, B. X., Haubold, C., Schiegg, M., Ales, J.,**  
681 **Beier, T., Rudy, M., et al.** (2019). ilastik: interactive machine learning for (bio)image  
682 analysis. *Nat Methods* **16**, 1226–1232.

683 **Blassberg, R., Patel, H., Watson, T., Gouti, M., Metzis, V., Delás, M. J. and Briscoe, J.** (2022).  
684 Sox2 levels regulate the chromatin occupancy of WNT mediators in epiblast progenitors  
685 responsible for vertebrate body formation. *Nat Cell Biol* **24**, 633–644.

686 **Brennan, J., Lu, C. C., Norris, D. P., Rodriguez, T. A., Beddington, R. S. P. and Robertson, E. J.**  
687 (2001). Nodal signalling in the epiblast patterns the early mouse embryo. *Nature* **411**,  
688 965–969.

- 689 **Camacho-Aguilar, E. and Warmflash, A.** (2020). Insights into mammalian morphogen dynamics  
690 from embryonic stem cell systems. *Current Topics in Developmental Biology* **137**, 279–  
691 305.
- 692 **Camacho-Aguilar, E., Warmflash, A. and Rand, D. A.** (2021). Quantifying cell transitions in *C.*  
693 *elegans* with data-fitted landscape models. *PLoS Computational Biology* **17**, 1–28.
- 694 **Chhabra, S. and Warmflash, A.** (2021). BMP-treated human embryonic stem cells  
695 transcriptionally resemble amnion cells in the monkey embryo. *Biology Open* **10**,  
696 bio058617.
- 697 **Chhabra, S., Liu, L., Goh Id, R., Kong, X. and Warmflash Id, A.** (2019). Dissecting the dynamics  
698 of signaling events in the BMP, WNT, and NODAL cascade during self-organized fate  
699 patterning in human gastruloids. *PLoS biology* **17**,.
- 700 **Conlon, F. L., Lyons, K. M., Takaesu, N., Barth, K. S., Kispert, A., Herrmann, B. and Robertson,**  
701 **E. J.** (1994). A primary requirement for nodal in the formation and maintenance of the  
702 primitive streak in the mouse. *Development (Cambridge, England)* **120**, 1919–1928.
- 703 **Coomer, M. A., Ham, L. and Stumpf, M. P. H.** (2022). Noise distorts the epigenetic landscape  
704 and shapes cell-fate decisions. *Cell Systems* **13**, 83-102.e6.
- 705 **Corson, F. and Siggia, E. D.** (2012). Geometry, epistasis, and developmental patterning.  
706 *Proceedings of the National Academy of Sciences of the United States of America* **109**,  
707 5568–5575.
- 708 **Corson, F. and Siggia, E. D.** (2017). Gene-free methodology for cell fate dynamics during  
709 development. *eLife* **6**, e30743.
- 710 **Dessaud, E., Yang, L. L., Hill, K., Cox, B., Ulloa, F., Ribeiro, A., Mynett, A., Novitch, B. G. and**  
711 **Briscoe, J.** (2007). Interpretation of the sonic hedgehog morphogen gradient by a  
712 temporal adaptation mechanism. *Nature* **450**, 717–720.
- 713 **Etoc, F., Metzger, J., Ruzo, A., Kirst, C., Yoney, A., Ozair, M. Z., Brivanlou, A. H. and Siggia, E. D.**  
714 (2016). A Balance between Secreted Inhibitors and Edge Sensing Controls Gastruloid  
715 Self-Organization. *Developmental Cell* **39**, 302–315.
- 716 **Fu, J., Warmflash, A. and Lutolf, M. P.** (2021). Stem-cell-based embryo models for fundamental  
717 research and translation. *Nature Materials* **20**, 132–144.
- 718 **Fulton, T., Spiess, K., Thomson, L., Wang, Y., Clark, B., Hwang, S., Paige, B., Verd, B. and**  
719 **Steventon, B.** (2022). Cell Rearrangement Generates Pattern Emergence as a Function  
720 of Temporal Morphogen Exposure. 2021.02.05.429898.
- 721 **Gunne-braden, A., Sullivan, A., Gharibi, B., Wollman, R., East, P., Santos, S. D. M., Gunne-**  
722 **braden, A., Sullivan, A., Gharibi, B., Sheriff, R. S. M., et al.** (2020). GATA3 Mediates a

- 723 Fast , Irreversible Commitment to BMP4-Driven Differentiation in Human Embryonic  
724 Stem Cells. *Stem Cell* 1–14.
- 725 **Heemskerk, I.** (2020). Full of potential: Pluripotent stem cells for the systems biology of  
726 embryonic patterning. *Developmental Biology* **460**, 86–98.
- 727 **Heemskerk, I., Burt, K., Miller, M., Chhabra, S., Guerra, M. C., Liu, L. and Warmflash, A.** (2019).  
728 Rapid changes in morphogen concentration control self-organized patterning in human  
729 embryonic stem cells. *eLife* **8**,
- 730 **Huang, S.** (2012). The molecular and mathematical basis of Waddington’s epigenetic landscape:  
731 A framework for post-Darwinian biology? *BioEssays* **34**, 149–157.
- 732 **Jo, K., Teague, S., Chen, B., Khan, H. A., Freeburne, E., Li, H., Li, B., Ran, R., Spence, J. R. and**  
733 **Heemskerk, I.** (2022). Efficient differentiation of human primordial germ cells through  
734 geometric control reveals a key role for Nodal signaling. *eLife* **11**, e72811.
- 735 **Kurek, D., Neagu, A., Tastemel, M., Tüysüz, N., Lehmann, J., van de Werken, H. J. G., Philipsen,**  
736 **S., van der Linden, R., Maas, A., van IJcken, W. F. J., et al.** (2015). Endogenous WNT  
737 Signals Mediate BMP-Induced and Spontaneous Differentiation of Epiblast Stem Cells  
738 and Human Embryonic Stem Cells. *Stem Cell Reports* **4**, 114–128.
- 739 **Lacoste, A., Berenshteyn, F. and Brivanlou, A. H.** (2009). An Efficient and Reversible  
740 Transposable System for Gene Delivery and Lineage-Specific Differentiation in Human  
741 Embryonic Stem Cells. *Cell Stem Cell* **5**, 332–342.
- 742 **Li, Y., Moretto-Zita, M., Soncin, F., Wakeland, A., Wolfe, L., Leon-Garcia, S., Pandian, R., Pizzo,**  
743 **D., Cui, L., Nazor, K., et al.** (2013). BMP4-directed trophoblast differentiation of human  
744 embryonic stem cells is mediated through a  $\Delta Np63+$  cytotrophoblast stem cell state.  
745 *Development (Cambridge, England)* **140**, 3965–3976.
- 746 **Liu, P., Wakamiya, M., Shea, M. J., Albrecht, U., Behringer, R. R. and Bradley, A.** (1999).  
747 Requirement for Wnt3 in vertebrate axis formation. *Nature Genetics* **22**, 361–365.
- 748 **Martyn, I., Kanno, T. Y., Ruzo, A., Siggia, E. D. and Brivanlou, A. H.** (2018). Self-organization of  
749 a human organizer by combined Wnt and Nodal signalling. *Nature* **558**, 132–135.
- 750 **Massey, J., Liu, Y., Alvarenga, O., Saez, T., Schmerer, M. and Warmflash, A.** (2019). Synergy  
751 with TGF $\beta$  ligands switches WNT pathway dynamics from transient to sustained during  
752 human pluripotent cell differentiation. *Proceedings of the National Academy of Sciences*  
753 **116**, 4989.
- 754 **Matsuda, M., Hayashi, H., Garcia-Ojalvo, J., Yoshioka-Kobayashi, K., Kageyama, R., Yamanaka,**  
755 **Y., Ikeya, M., Toguchida, J., Alev, C. and Ebisuya, M.** (2020). Species-specific  
756 segmentation clock periods are due to differential biochemical reaction speeds. *Science*  
757 **369**, 1450–1455.

- 758 **Minn, K. T., Fu, Y. C., He, S., Dietmann, S., George, S. C., Anastasio, M. A., Morris, S. A. and**  
759 **Solnica-Krezel, L.** (2020). High-resolution transcriptional and morphogenetic profiling of  
760 cells from micropatterned human ESC gastruloid cultures. *eLife* **9**, e59445.
- 761 **Mojtahedi, M., Skupin, A., Zhou, J., Castaño, I. G., Leong-Quong, R. Y. Y., Chang, H., Trachana,**  
762 **K., Giuliani, A. and Huang, S.** (2016). Cell Fate Decision as High-Dimensional Critical  
763 State Transition. *PLOS Biology* **14**, e2000640.
- 764 **Nemashkalo, A., Ruzo, A., Heemskerk, I. and Warmflash, A.** (2017). Morphogen and  
765 community effects determine cell fates in response to BMP4 signaling in human  
766 embryonic stem cells. *Development (Cambridge)* **144**,.
- 767 **Preibisch, S., Saalfeld, S. and Tomancak, P.** (2009). Globally optimal stitching of tiled 3D  
768 microscopic image acquisitions. *Bioinformatics* **25**, 1463–1465.
- 769 **Rand, D. A., Raju, A., Sáez, M., Corson, F. and Siggia, E. D.** (2021). Geometry of gene regulatory  
770 dynamics. *Proceedings of the National Academy of Sciences* **118**, e2109729118.
- 771 **Rayon, T., Stamatakis, D., Perez-Carrasco, R., Garcia-Perez, L., Barrington, C., Melchionda, M.,**  
772 **Exelby, K., Lazaro, J., Tybulewicz, V. L. J., Fisher, E. M. C., et al.** (2020). Species-specific  
773 pace of development is associated with differences in protein stability. *Science* **369**,  
774 eaba7667.
- 775 **Sáez, M., Blassberg, R., Camacho-Aguilar, E., Siggia, E. D., Rand, D. A. and Briscoe, J.** (2022).  
776 Statistically derived geometrical landscapes capture principles of decision-making  
777 dynamics during cell fate transitions. *Cell Systems* **13**, 12-28.e3.
- 778 **Sagner, A. and Briscoe, J.** (2017). Morphogen interpretation: concentration, time, competence,  
779 and signaling dynamics. *Wiley Interdisciplinary Reviews: Developmental Biology* e271.
- 780 **Shahbazi, M. N., Siggia, E. D. and Zernicka-Goetz, M.** (2019). Self-organization of stem cells into  
781 embryos: A window on early mammalian development. *Science* **364**, 948–951.
- 782 **Sommer, C., Straehle, C., Köthe, U. and Hamprecht, F. A.** (2011). Ilastik: Interactive learning  
783 and segmentation toolkit. In *2011 IEEE International Symposium on Biomedical Imaging:*  
784 *From Nano to Macro*, pp. 230–233.
- 785 **Tewary, M., Ostblom, J., Prochazka, L., Zulueta-Coarasa, T., Shakiba, N., Fernandez-Gonzalez,**  
786 **R. and Zandstra, P. W.** (2017). A stepwise model of reaction-diffusion and positional  
787 information governs self-organized human peri-gastrulation-like patterning.  
788 *Development* **144**, 4298–4312.
- 789 **Tortelote, G. G., Hernández-Hernández, J. M., Quaresma, A. J. C., Nickerson, J. A., Imbalzano,**  
790 **A. N. and Rivera-Pérez, J. A.** (2013). Wnt3 function in the epiblast is required for the  
791 maintenance but not the initiation of gastrulation in mice. *Developmental biology* **374**,  
792 164–173.



- 793 **Valcourt, J. R., Huang, R. E., Kundu, S., Venkatasubramanian, D., Kingston, R. E. and**  
794 **Ramanathan, S.** (2021). Modulating mesendoderm competence during human germ  
795 layer differentiation. *Cell Reports* **37**, 109990.
- 796 **Wang, J., Sinha, T. and Wynshaw-Boris, A.** (2012). Wnt Signaling in Mammalian Development:  
797 Lessons from Mouse Genetics. *Cold Spring Harb Perspect Biol* **4**, a007963.
- 798 **Warmflash, A., Sorre, B., Etoc, F., Siggia, E. D. and Brivanlou, A. H.** (2014). A method to  
799 recapitulate early embryonic spatial patterning in human embryonic stem cells. *Nature*  
800 *methods* **11**, 847–54.
- 801 **Winnier, G., Blessing, M., Labosky, P. A. and Hogan, B. L.** (1995). Bone morphogenetic protein-  
802 4 is required for mesoderm formation and patterning in the mouse. *Genes &*  
803 *development* **9**, 2105–2116.
- 804 **Xu, R.-H., Chen, X., Li, D. S., Li, R., Addicks, G. C., Glennon, C., Zwaka, T. P. and Thomson, J. A.**  
805 (2002). BMP4 initiates human embryonic stem cell differentiation to trophoblast. *Nature*  
806 *biotechnology* **20**, 1261–1264.
- 807 **Yang, R., Goedel, A., Kang, Y., Si, C., Chu, C., Zheng, Y., Chen, Z., Gruber, P. J., Xiao, Y., Zhou,**  
808 **C., et al.** (2021). Amnion signals are essential for mesoderm formation in primates. *Nat*  
809 *Commun* **12**, 5126.
- 810 **Yoney, A., Etoc, F., Ruzo, A., Carroll, T., Metzger, J. J., Martyn, I., Li, S., Kirst, C., Siggia, E. D.**  
811 **and Brivanlou, A. H.** (2018). WNT signaling memory is required for ACTIVIN to function  
812 as a morphogen in human gastruloids. *eLife* **7**, 1–28.
- 813 **Yoney, A., Bai, L., Brivanlou, A. H. and Siggia, E. D.** (2022). Mechanisms underlying WNT-  
814 mediated priming of human embryonic stem cells. *Development* **149**, dev200335.
- 815 **Zhang, P., Li, J., Tan, Z., Wang, C., Liu, T., Chen, L., Yong, J., Jiang, W., Sun, X., Du, L., et al.**  
816 (2008). Short-term BMP-4 treatment initiates mesoderm induction in human embryonic  
817 stem cells. *Blood* **111**, 1933–1941.
- 818
